# Supplementary material
Source: PubMed Central journal article supplement (PMC4135684)
Supplement: JB.01903-14_zjb999093299so1.pdf [file JB.01903-14_zjb999093299so1.pdf]

1 Supplemental Material

2 Identification of a unique radical SAM methylase likely involved in methanopterin biosynthesis  
3 in *Methanocaldococcus jannaschii*

4

5 Kylie D. Allen, Huimin Xu, and Robert H. White#

6

7 Department of Biochemistry, Virginia Polytechnic Institute and State University, Blacksburg,  
8 Virginia, USA

9

10 Running head: Radical SAM methylase in methanopterin biosynthesis

11

12 # Corresponding author. Phone: (540) 231-6605. Fax: (540) 231-9070. E-mail: [rhwhite@vt.edu](mailto:rhwhite@vt.edu)

13

14

15

16

17

18

19

| Compound                      | Precursor ion (m/z) | Product ion (m/z) | Dwell time (ms) | DP (V) | CE (V) |
|-------------------------------|---------------------|-------------------|-----------------|--------|--------|
| 7-methylpterin                | 178.1               | 133.1             | 100             | 20     | 33     |
|                               | 178.1               | 106.1             | 100             | 20     | 33     |
|                               | 178.1               | 92.1              | 75              | 20     | 33     |
| 6-ethyl-7-methylpterin        | 206.1               | 179.1             | 100             | 20     | 30     |
|                               | 206.1               | 163.1             | 100             | 20     | 30     |
| 6-hydroxyethyl-7-methylpterin | 222.1               | 204.2             | 100             | 20     | 30     |
|                               | 222.1               | 161.1             | 100             | 20     | 30     |
|                               | 222.1               | 132.1             | 75              | 20     | 30     |
| Folate                        | 440.3               | 311.1             | 100             | -55    | -30    |
| Folate + 14*                  | 454.3               | 325.3             | 100             | -55    | -30    |
| Folate + 28**                 | 468.3               | 339.3             | 100             | -55    | -30    |

20  
21 Supplemental Table 1. Multiple reaction monitoring (MRM) mode parameters for LC-ESI-MS  
22 detection of pterins and folates in *E. coli* cell extracts.

23  
24 \*Folate with one methyl group at C-7 or C-9.  
25 \*\*Folate with two methyl groups at C-7 and C-9 or a formyl group. The product ions cannot  
26 distinguish between the two possibilities. Since both the *E.coli*\_MJ0619 and the *E.coli*\_control  
27 cells have this peak, we concluded that the observed peak is *N*<sup>10</sup>-formylfolate.

28  
29  
30  
31  
32  
33  
34  
35  
36

37  
38  
39  
40  
41  
42  
43  
44  
45  
46  
47  
48  
49  
50  
51  
52  
53  
54  
55  
56  
57  
58  
59  
60  
61  
62  
63

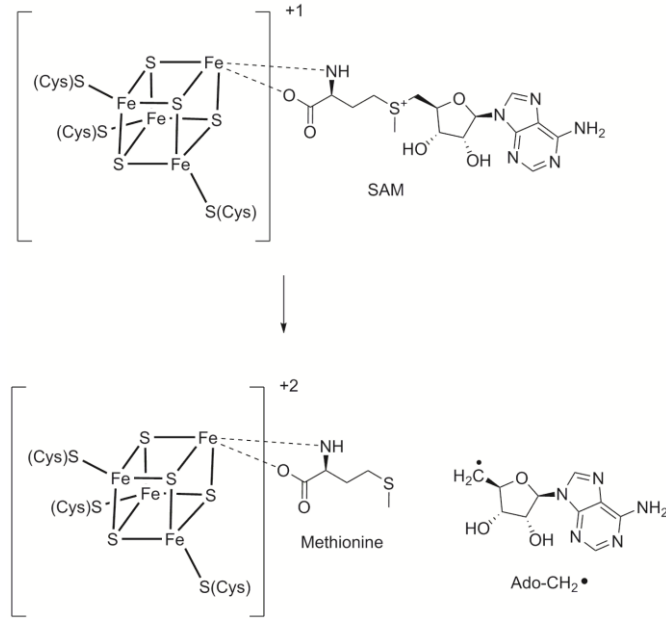

Supplemental Figure 1. First step in radical SAM enzyme catalysis to form the 5'-deoxyadenosyl radical (Ado-CH<sub>2</sub>•).

64  
65  
66  
67  
68  
69  
70  
71  
72  
73  
74  
75  
76  
77  
78  
79  
80  
81  
82  
83  
84  
85  
86  
87  
88  
89

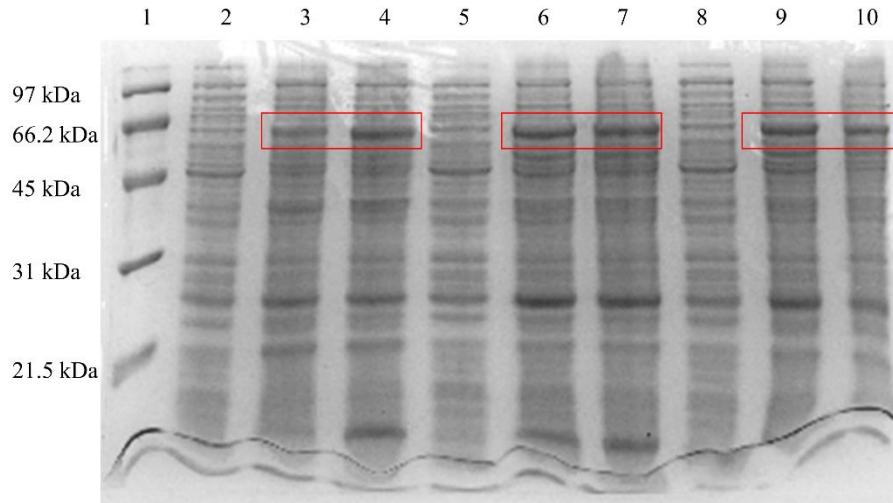

Supplemental Figure 2. SDS-PAGE gel of MJ0619, MJ0619-M1, and MJ0619-M2 expression in *E. coli* grown in LB media. Lane 1- Molecular weight marker, Lane 2- *E. coli* + pMJ0619 before induction, Lane 3- *E. coli* + pMJ0619 2 h after induction, Lane 4- *E. coli* + pMJ0619 4 h after induction, Lane 5- *E. coli* + pMJ0619-M1 before induction, Lane 6- *E. coli* + pMJ0619-M1 2 h after induction, Lane 7- *E. coli* + pMJ0619-M1 4 h after induction, Lane 8- *E. coli* + pMJ0619-M2 before induction, Lane 9- *E. coli* + pMJ0619-M2 2 h after induction, Lane 10- *E. coli* + pMJ0619-M2 4 h after induction. The red boxes highlight the MJ0619 protein band. Protein identity was confirmed by MALDI mass spectral analysis.

90  
91  
92  
93  
94  
95  
96  
97  
98  
99  
100  
101  
102  
103  
104  
105  
106  
107  
108  
109  
110  
111  
112  
113  
114  
115  
116

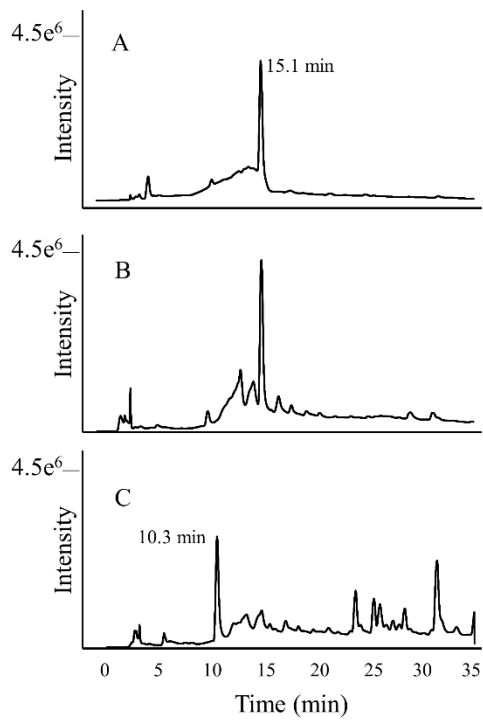

Supplemental Figure 3. HPLC fluorescence chromatogram of extracted and partially purified pterins. (A) authentic 7-methylpterin, (B) pterins from *E. coli*\_MJ0619 and, (C) pterins from *E. coli*\_control. 10.3 min peak is pterin.

117  
118  
119  
120  
121  
122  
123  
124  
125  
126  
127  
128  
129  
130  
131  
132  
133  
134  
135  
136  
137  
138  
139  
140  
141  
142  
143

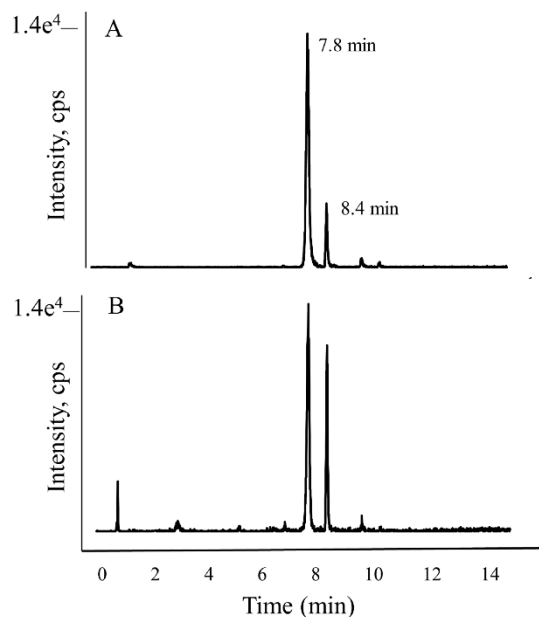

Supplemental Figure 4. LC-MS MRM ion chromatogram of extracted and partially purified folates from *E. coli* cells. (A) Folates isolated from *E.coli\_MJ0619* cells and (B) Folates isolated from *E.coli\_control* cells. 7.8 min peak is  $N^{10}$ -formylfolate and 8.4 min peak is folate.

144  
145  
146  
147  
148  
149  
150  
151  
152  
153  
154  
155  
156  
157  
158  
159  
160  
161  
162  
163  
164  
165  
166  
167  
168  
169  
170

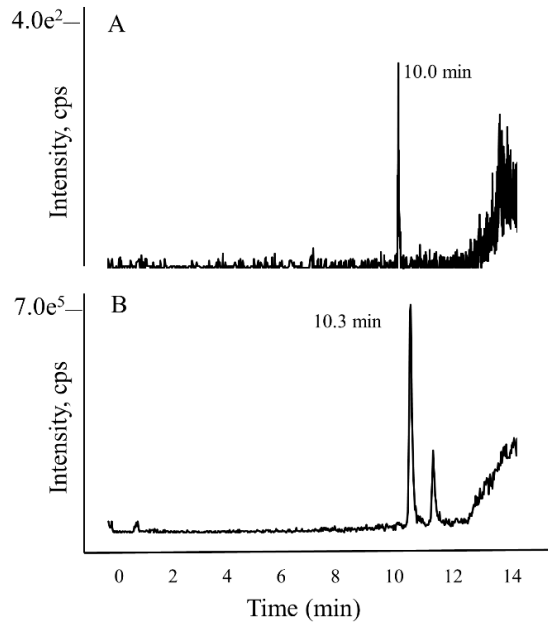

Supplemental Figure 5. LC-MS MRM ion chromatogram of synthetic methylated folates. (A) 7-methylfolate and (B) 7, 9- dimethylfolate (10.3 min).

171  
172  
173  
174  
175  
176  
177  
178  
179  
180  
181  
182  
183  
184  
185  
186  
187  
188  
189  
190  
191  
192  
193  
194

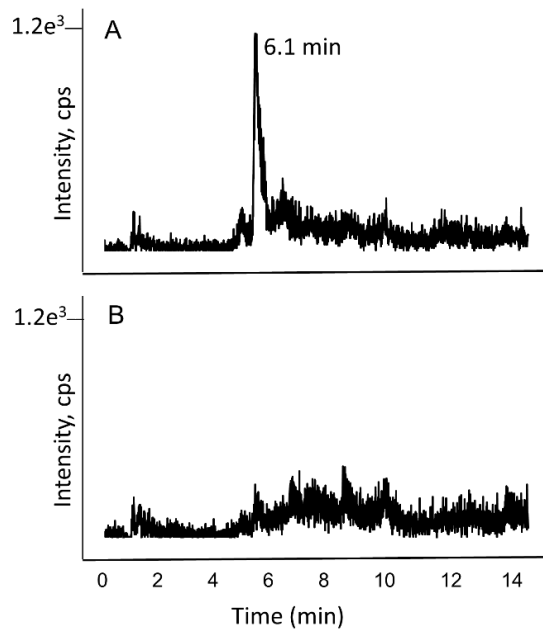

Supplemental Figure 6. LC-MS MRM traces for 7-methylpterin from *E. coli*\_MJ0619 Cys to Ala variants. (A) MJ0619 C77A and (B) MJ0619 C102A. The peak at 6.1 min corresponds to 7-methylpterin.



195  
196  
197  
198  
199  
200  
201  
202  
203  
204  
205  
206  
207  
208  
209  
210  
211  
212  
213  
214  
215

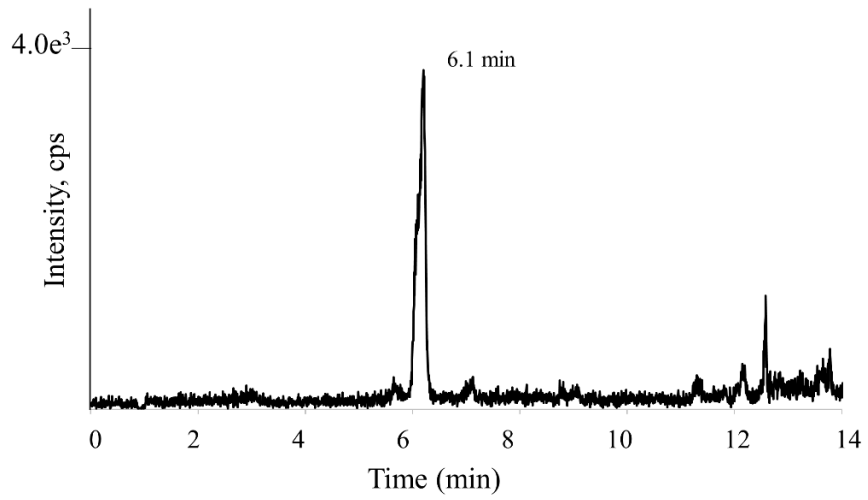

Supplemental Figure 7. LC-MS MRM trace for 7-methylpterin from *E. coli*\_MJ0619 grown in M9 media, demonstrating that the enzyme does not require cobalamin for methylation activity. The peak at 6.1 min corresponds to 7-methylpterin.
